# Supplementary material
Source: HighWire-hosted journal article supplement (http://molpharm.aspetjournals.org/highwire/filestream/87336/field_highwire_adjunct_files/0/421_Supp_fig.pdf)

## **SUPPLEMENTAL DATA**

### **A High-throughput Assay to Identify Drugs that can Treat Long QT Syndrome Caused by Trafficking-deficient Kv11.1 (hERG) Variants**

Christian L. Egly, PharmD<sup>1</sup>; Daniel J. Blackwell, PhD<sup>1</sup>; Jeffrey Schmeckpeper, MD, PhD<sup>1</sup>; Brian P. Delisle, PhD<sup>2</sup>; C. David Weaver, PhD<sup>3</sup>; Björn C. Knollmann, MD, PhD<sup>1</sup>

## **MOLECULAR PHARMACOLOGY**

**Manuscript number:** MOLPHARM-AR-2021-000421

Table 1 - Oligonucleotide primers used for identification of 3' Kv11.1 stop codon.

| Oligonucleotide name        | Sequence (5' – 3')                                         | Description                                       |
|-----------------------------|------------------------------------------------------------|---------------------------------------------------|
| 3' anchor primer 1<br>(AP1) | ACAGCAGGTCAGTCAAGCAGTA                                     |                                                   |
| 3' anchor primer 2<br>(AP2) | AGCAGTAGCAGCAGTTCGATAA                                     | Nested AP1                                        |
| Random 7mer<br>adapter      | ACAGCAGGTCAGTCAAGCAGTAGCAGCAGTTCGATAAGCGGCCGCCATGGANNNNNNN |                                                   |
| 5' Kv11.1-GSP<br>(1)        | TCACCTTCAACCTGCGAGAT                                       | Base pairs<br>2573-2592                           |
| 5' Kv11.1-GSP<br>(2)        | TAGAGGGTGGCTTCAGTCGG                                       | Base pairs<br>2630-2649                           |
| 5' Kv11.1-GSP<br>(3)        | ACCTGCGAGATACCAACATGA                                      | Nested 5'<br>Kv11.1-GSP<br>(1)                    |
| 5' Kv11.1-GSP<br>(4)        | AACGCAAGCGCAAGTTGTC                                        | Nested 5'<br>Kv11.1-GSP<br>(2)<br>(Start at 2651) |

Figure S1 – Western blot and sequencing reveal Kv11.1 truncation at glycine residue at amino acid 965 (G965). A) Western blot showing Kv11.1 and Kv11.1-G601S-G965\*X variant with and without increased Kv11.1 protein trafficking with 24-hour E-4031 treatment. B) Sequencing revealed Kv11.1 cDNA stops at residue G965 and encodes an additional 17 amino acids before a stop codon. Black line represents end of gene sequence and blue line indicates end of 17 amino acid addition.

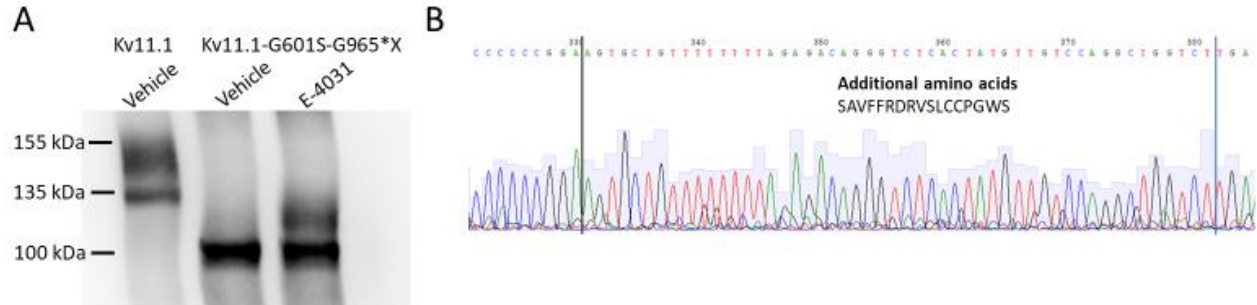

Figure S2 – Kv11.1-G601S-G965\*X variant performs better than Kv11.1-G601S in optimized Tl<sup>+</sup>-flux assay. **A**) Fluorescent traces from HEK-293 cell monolayers treated for 24 hours with positive or vehicle control after optimizing stimulus concentrations, Thallos loading, and cell density for the Tl<sup>+</sup> flux assay. Black arrow represents Tl<sup>+</sup> (4.5 mM) addition. All wells were washed out before experiments. **B**) Scatter plot showing Tl<sup>+</sup> flux slope values ( $\Delta F/s$ ) after 24-hour treatment with positive and vehicle control. Red line indicates mean slope ( $\Delta F/s$ ) for positive and vehicle control. Dotted black lines indicate  $\pm 3$  SDs from the mean of each control. For all experiments, vehicle (0.1% DMSO) or positive (10  $\mu$ M E-4031) were used (n=96 wells/treatment condition).

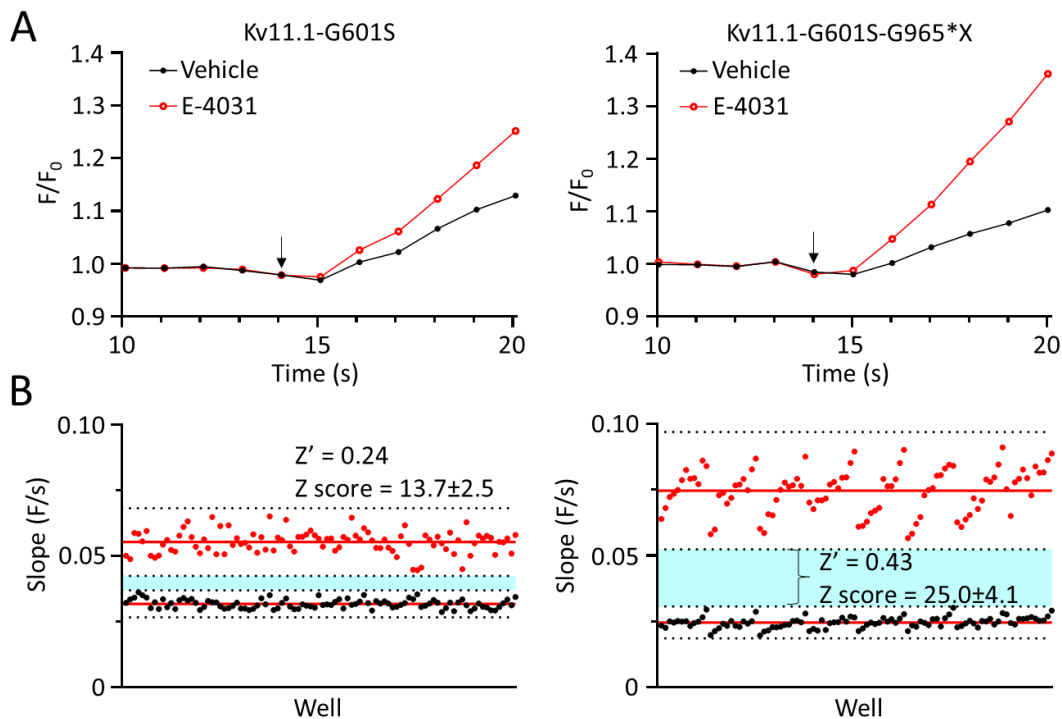

Figure S3 – Kv11.1 channel activator (VU0405601) increases steady-state activation current in wild-type Kv11.1 **A)** Example current traces of Kv11.1 in absence and presence of 10  $\mu\text{M}$  VU0405601. Dotted black line represents 0 current. **B)** Current-voltage (I-V) relationship of Kv11.1 steady-state current in absence (n=6 cells) and presence (n=3 cells) of 10  $\mu\text{M}$  VU0405601. **C)** Normalized tail current data from cells in absence (n=6 cells) and presence (n=3 cells) of 10  $\mu\text{M}$  VU0405601. All data in C normalized to the average of maximum tail current (pA/pF) from cells expressing Kv11.1 treated with vehicle. All data reported as mean  $\pm$  SD. Vehicle control = 0.1% DMSO treatment.

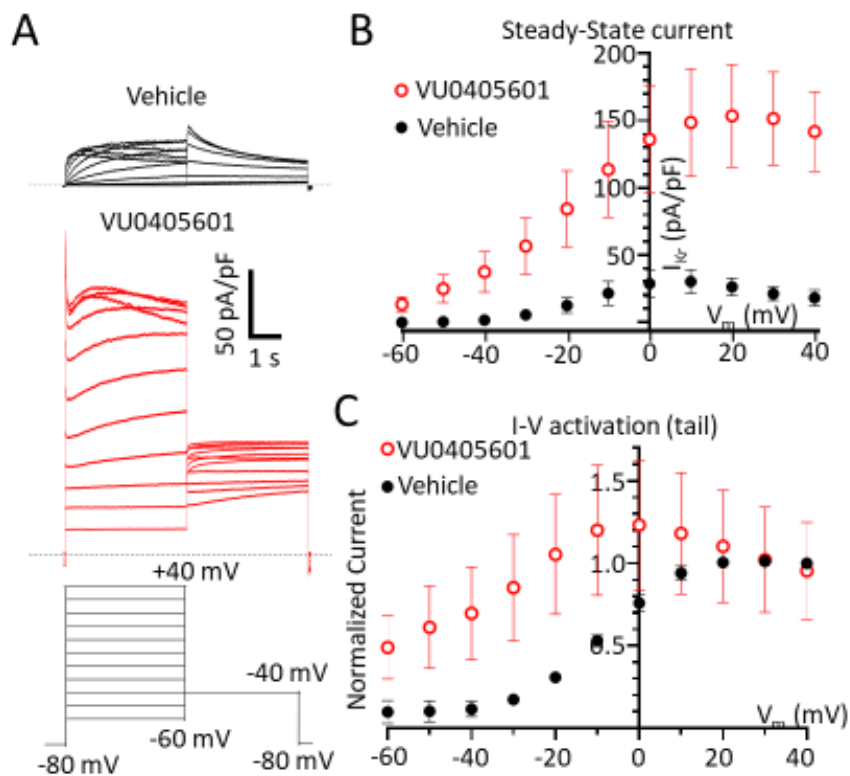

Figure S4 – Kv11.1 channel activator (VU0405601) decreases Kv11.1 channel inactivation in wild-type Kv11.1. **A**) Example Kv11.1 current traces in absence and presence of 10  $\mu$ M VU0405601 in extracellular bath solution during experiments. Inset shows Kv11.1 tail currents used to analyze peak current. Dotted black line indicates 0 current. **B**) Normalized current-voltage (I-V) relationship of Kv11.1 channel inactivation in absence and presence (n=3 cells/treatment) of 10  $\mu$ M VU0405601. Data normalized to the average of maximum tail current (pA/pF) in cells expressing Kv11.1 treated with vehicle. All data reported as mean  $\pm$  SD. Vehicle control = 0.1% DMSO.

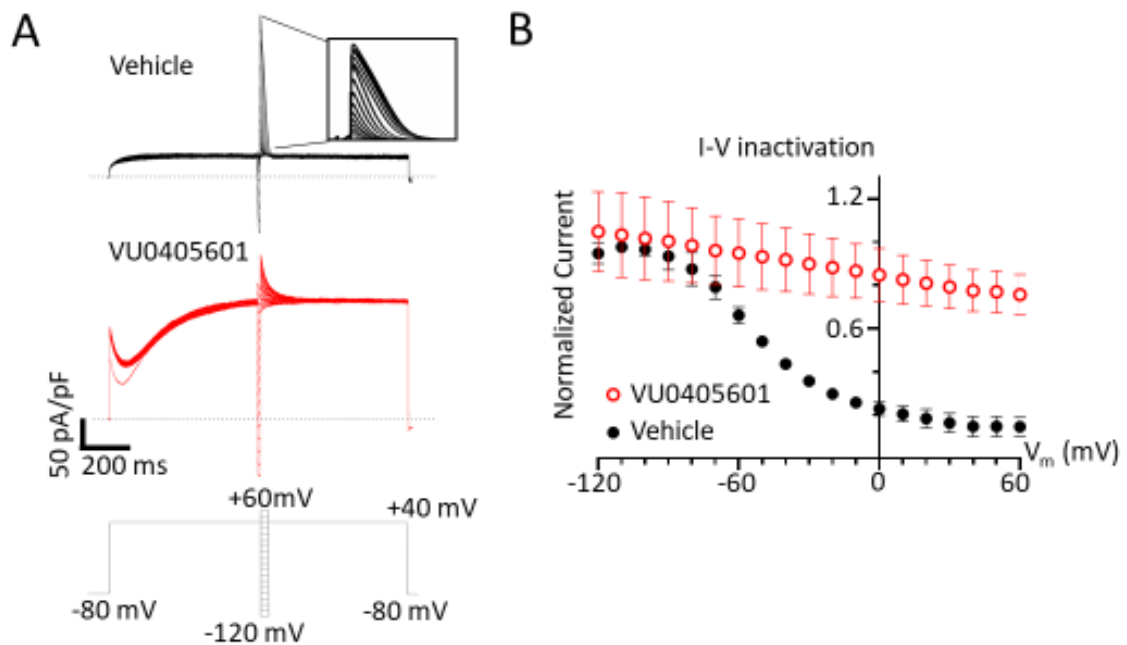

Figure S5 – Western blot from HEK-293 cells expressing Kv11.1-G601S showing increased fully glycosylated protein, representative of increased protein trafficking after 24-hour treatment with 10  $\mu$ M of azelastine, azaperone, or ibutilide. All wells loaded with 20  $\mu$ g of protein. Vehicle = 0.1% DMSO.

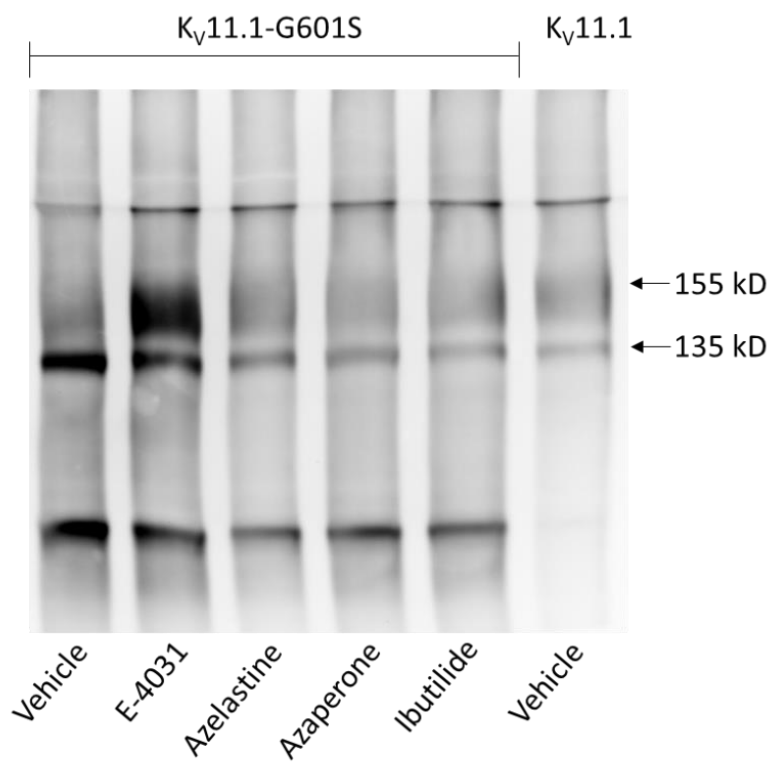

Figure S6 – Drugs that increase Kv11.1-G601-G965\*X trafficking do not increase Kv11.1 (wild-type) trafficking or function. Concentration response comparing 24-hour treatment and washout with 10  $\mu$ M positive control (E-4031) or azelastine, azaperone, and ibutilide in Kv11.1 (blue open symbols) and Kv11.1-G601S-G965X (black closed symbols). The graph shows slope ( $\Delta F/s$ ) with the average slope of 38 wells (0.1% DMSO control) subtracted. N=5 wells for each concentration tested. All data reported as mean  $\pm$  SD.

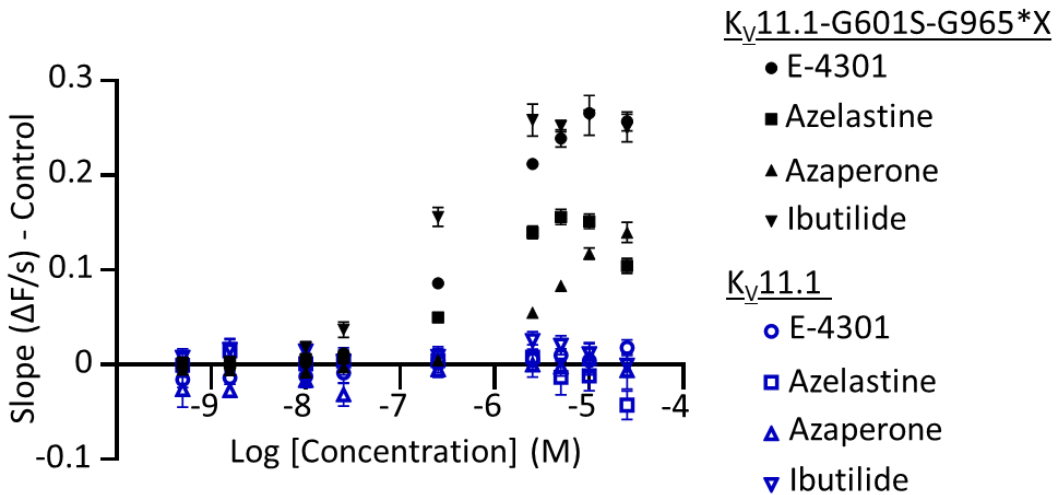

Supplement: 421_Supp_fig.pdf [file 421_Supp_fig.pdf]
